# Supplementary material for: Manipulating the Subcellular Localization and Anticancer Effects of Benzophenothiaziniums by Minor Alterations of N-Alkylation
Source: MDPI journal article supplement (doi:10.3390/molecules28041714), 2023-02-10
Supplement: s1 [file s1]

## Supporting information

### Manipulating the Subcellular Localization and Anti-cancer Effect of Benzophenothiaziniums by Minor Alteration of N-Alkylation

Yanping Wu,<sup>a</sup> Yuncong Chen,<sup>a,b\*</sup> Shankun Yao,<sup>a</sup> Shumeng Li,<sup>a</sup> Hao Yuan,<sup>a</sup> Fen Qi,<sup>a</sup> Weijiang He,<sup>a\*</sup> Zijian Guo<sup>a,b\*</sup>

<sup>a</sup> State Key Laboratory of Coordination Chemistry, Coordination Chemistry Institute, School of Chemistry and Chemical Engineering, Nanjing University, Nanjing 210093, PR China

<sup>b</sup> Chemistry and Biomedicine Innovation Center, Nanjing University, Nanjing 210023, PR China

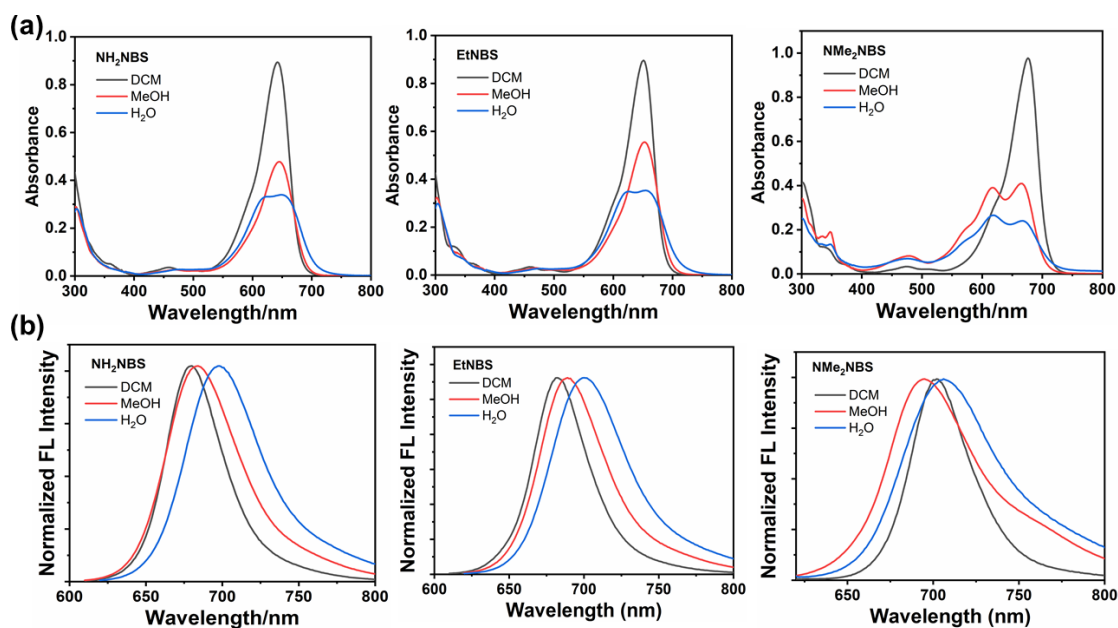

**Figure S1.** Normalized absorption and emission spectra of  $\text{NH}_2\text{NBS}$ ,  $\text{EtNBS}$ ,  $\text{NMe}_2\text{NBS}$  in PBS solvents. The concentration used for each compound was  $10 \mu\text{M}$ .

**Table S1.** Physical and photophysical properties.

| Solvent              | Dye                      | $\lambda_{\text{abs}}$ (nm) | $\epsilon(\text{M}^{-1}\text{cm}^{-1})$ | $\lambda_{\text{em}}$ (nm) | $\Phi_{\text{fl}}$ | $\Phi_{\Delta}$ |
|----------------------|--------------------------|-----------------------------|-----------------------------------------|----------------------------|--------------------|-----------------|
| DCM                  | $\text{NH}_2\text{NBS}$  | 642                         | 89351                                   | 680                        | 0.24               | N.D.            |
|                      | $\text{EtNBS}$           | 651                         | 89585                                   | 682                        | 0.40               | N.D.            |
|                      | $\text{NMe}_2\text{NBS}$ | 676                         | 97661                                   | 702                        | 0.20               | N.D.            |
| MeOH                 | $\text{NH}_2\text{NBS}$  | 645                         | 47781                                   | 684                        | 0.10               | 0.057           |
|                      | $\text{EtNBS}$           | 653                         | 55495                                   | 689                        | 0.14               | 0.060           |
|                      | $\text{NMe}_2\text{NBS}$ | 665                         | 40942                                   | 695                        | 0.04               | 0.034           |
| $\text{H}_2\text{O}$ | $\text{NH}_2\text{NBS}$  | 649                         | 33957                                   | 698                        | 0.02               | N.D.            |
|                      | $\text{EtNBS}$           | 654                         | 35314                                   | 700                        | 0.03               | N.D.            |
|                      | $\text{NMe}_2\text{NBS}$ | 667                         | 24061                                   | 706                        | 0.015              | N.D.            |

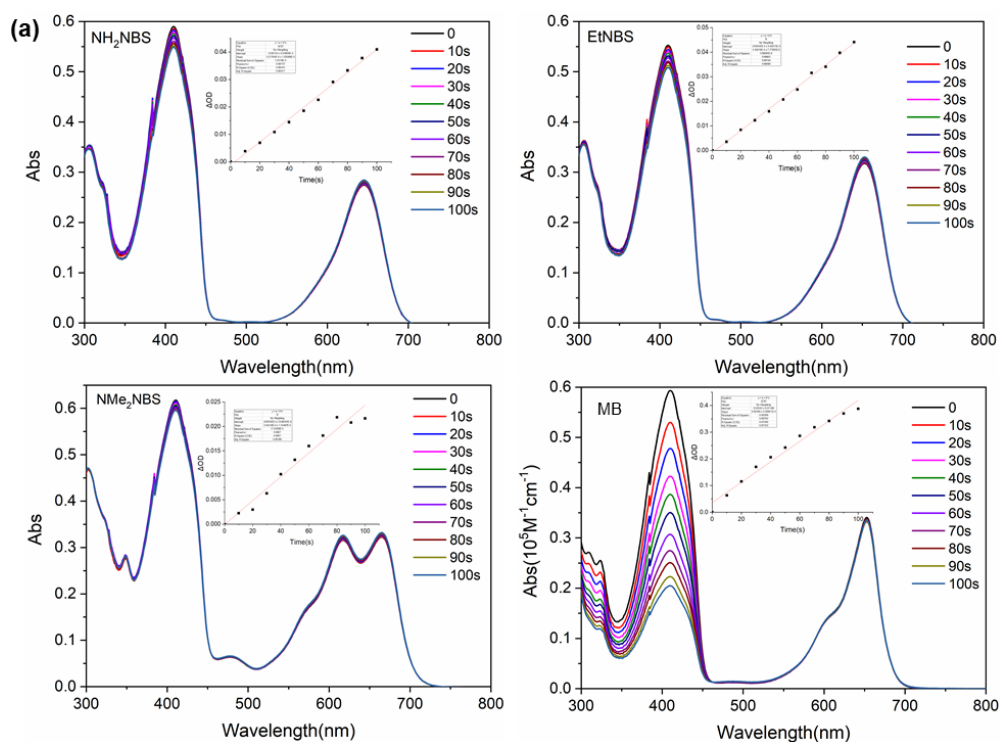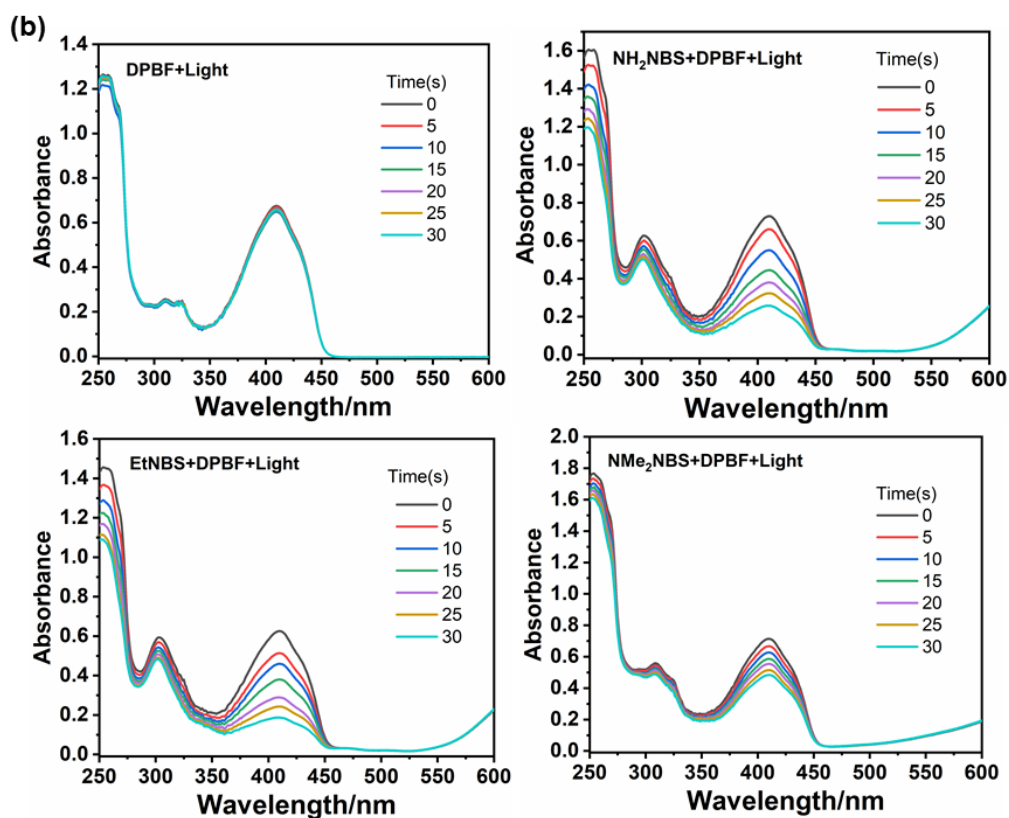

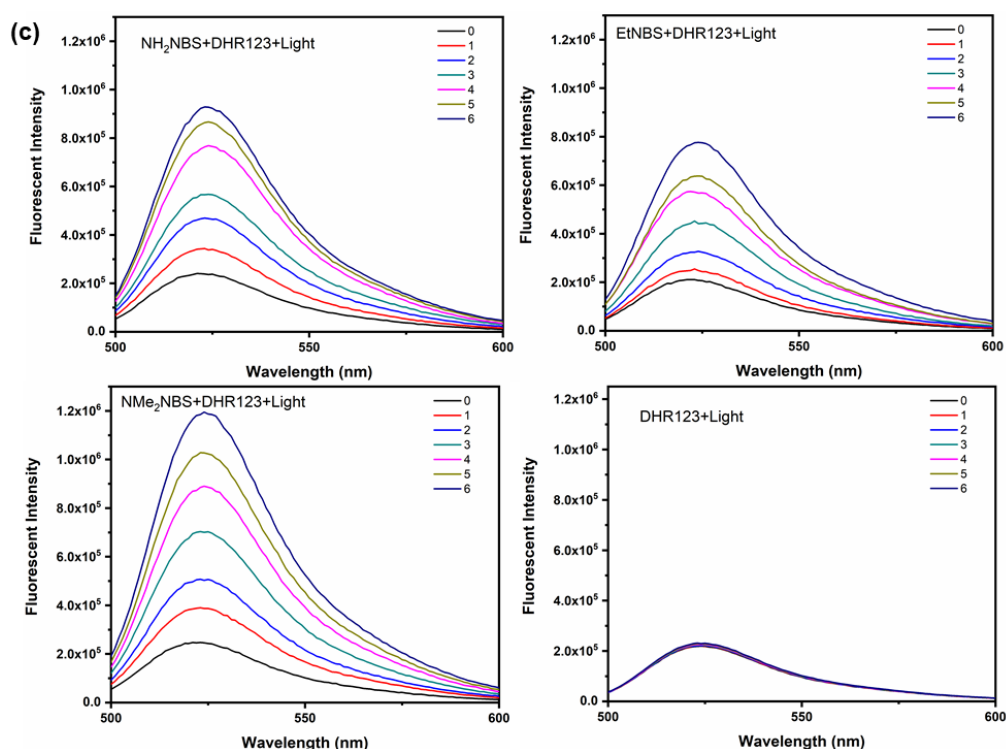

**Figure S2.** (a) The singlet oxygen quantum yields of the three PSs were determined in MeOH using DPBF bleaching assay (after 635 nm irradiation for 100 seconds, Dye concentration: 10  $\mu$ M). (b) Photoinduced  $^1\text{O}_2$  production was determined in MeOH (after 635 nm, 20  $\text{mW cm}^{-1}$ , irradiation for 30s, Dye concentration: 10  $\mu$ M) (c) Photoinduced  $\text{O}_2^{\bullet-}$  radical generation was determined in PBS solution using DHR 123 (after 635 nm, 20  $\text{mW cm}^{-1}$ , irradiation for 6 min, Dye concentration: 10  $\mu$ M).

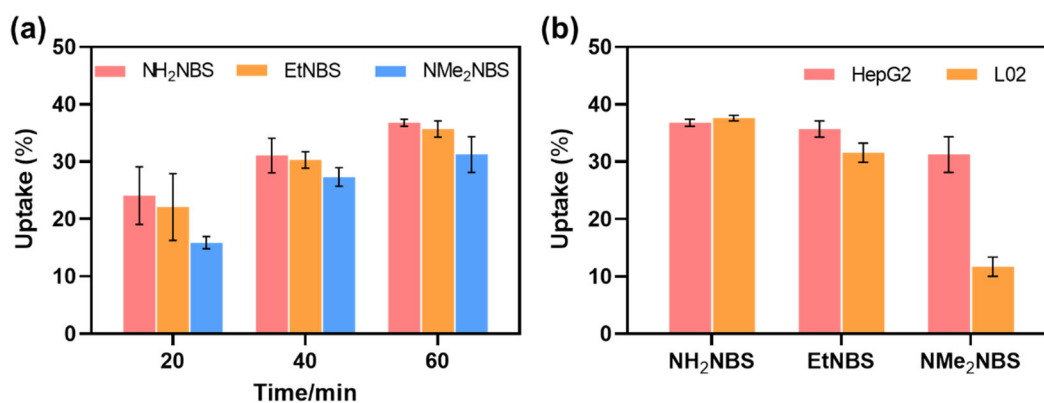

**Figure S3.** (a) Uptake of three PSs by HepG2 cells at different time intervals. (b) Uptake of three PSs by HepG2 cells and L02 cells after incubation for one hour.

**Table. S2** Phototoxicity and dark toxicity of  $\text{NH}_2\text{NBS}$ ,  $\text{EtNBS}$ ,  $\text{NMe}_2\text{NBS}$  against L02 cells.

| Compound                 | $\text{IC}_{50}(\mu\text{M})$ |                        |               |
|--------------------------|-------------------------------|------------------------|---------------|
|                          | Dark                          | Light ( $\text{N}^a$ ) | $\text{PI}^c$ |
| $\text{NH}_2\text{NBS}$  | $3.00 \pm 0.40$               | $0.039 \pm 0.001$      | 77            |
| $\text{EtNBS}$           | $4.69 \pm 0.27$               | $0.050 \pm 0.010$      | 94            |
| $\text{NMe}_2\text{NBS}$ | $57.04 \pm 2.86$              | $1.15 \pm 0.35$        | 50            |

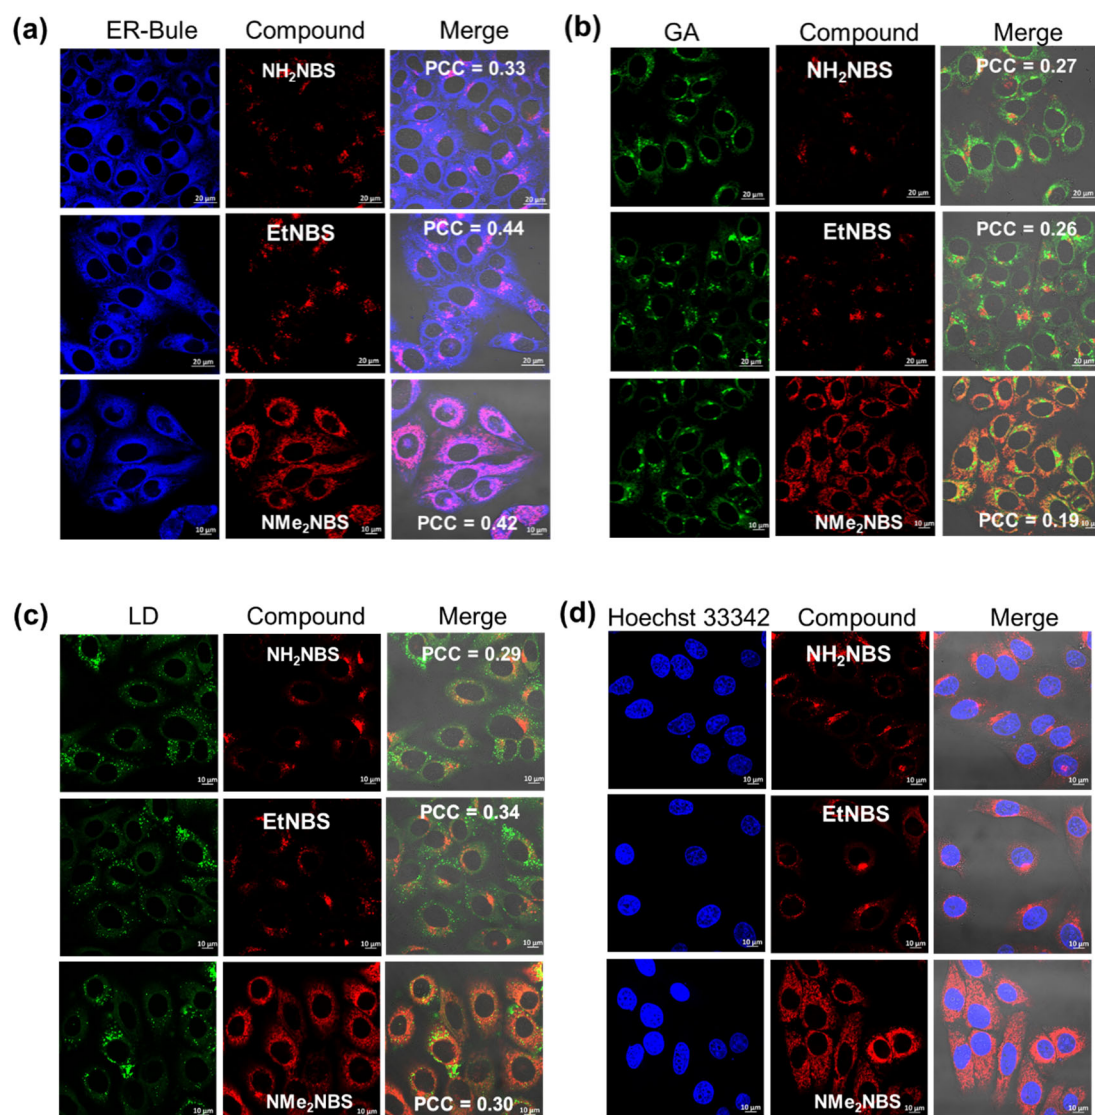

**Figure S4.** Subcellular localization of NH<sub>2</sub>NBS (100 nM), EtNBS (100 nM), NMe<sub>2</sub>NBS (100 nM), ER Blue white (1 μM), GA: Golgi apparatus Green (1 μM), LD: Lipid green (1 μM).

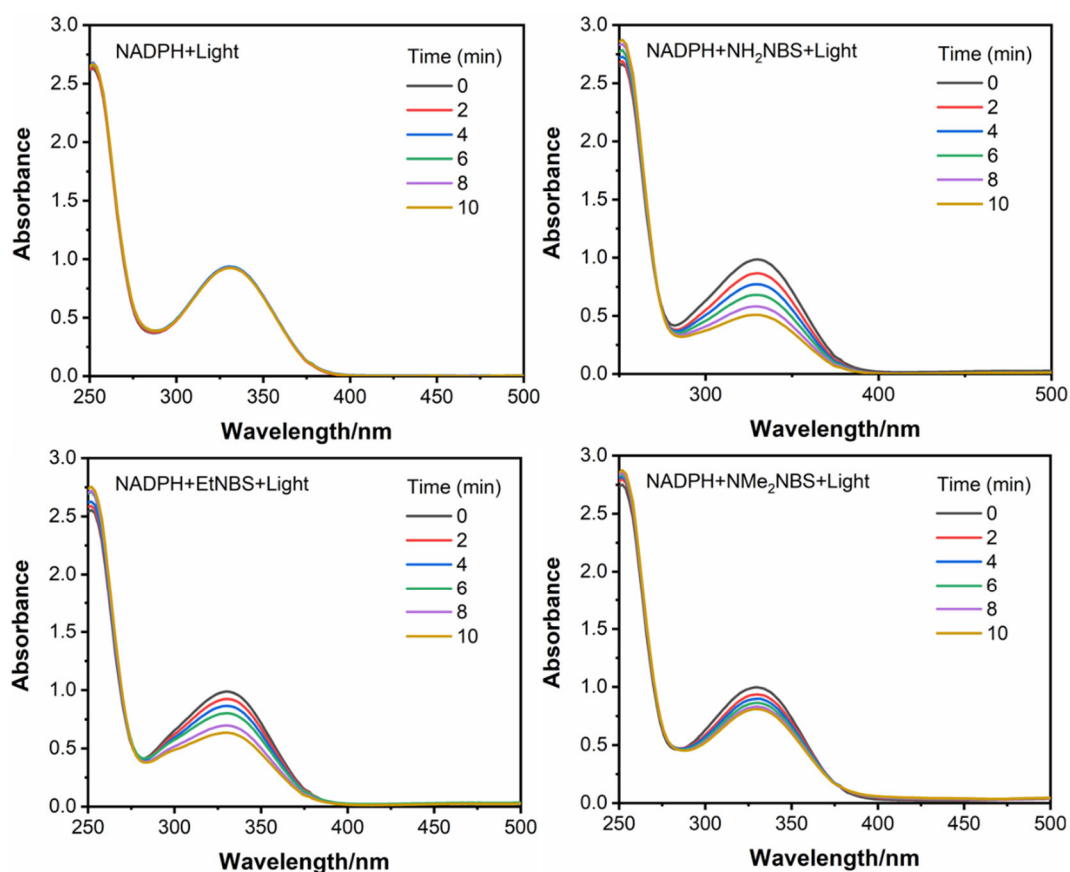

**Figure S5.** UV-Vis spectra of photocatalytic oxidation of three PSs (10  $\mu\text{M}$ ) with NADPH (160  $\mu\text{M}$ ) in PBS solution, after different time of 635 nm irradiation at a power density 20  $\text{mW}/\text{cm}^2$ .

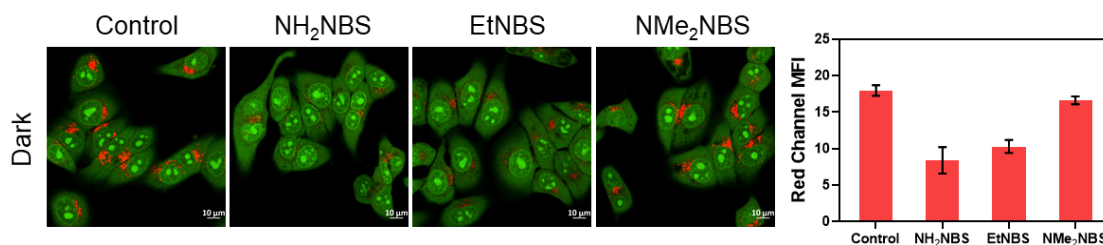

**Figure S6.** The confocal fluorescence images of AO staining after co-cultured HepG2 cells with high concentration of NH<sub>2</sub>NBS, EtNBS and NMe<sub>2</sub>NBS (1  $\mu\text{M}$ ).

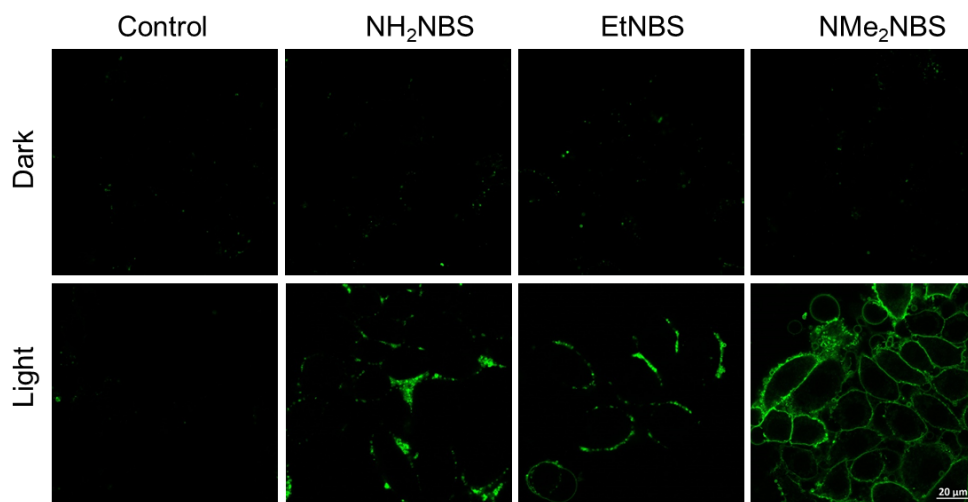

**Figure S7.** The confocal fluorescence images of Annexin V-FITC staining.

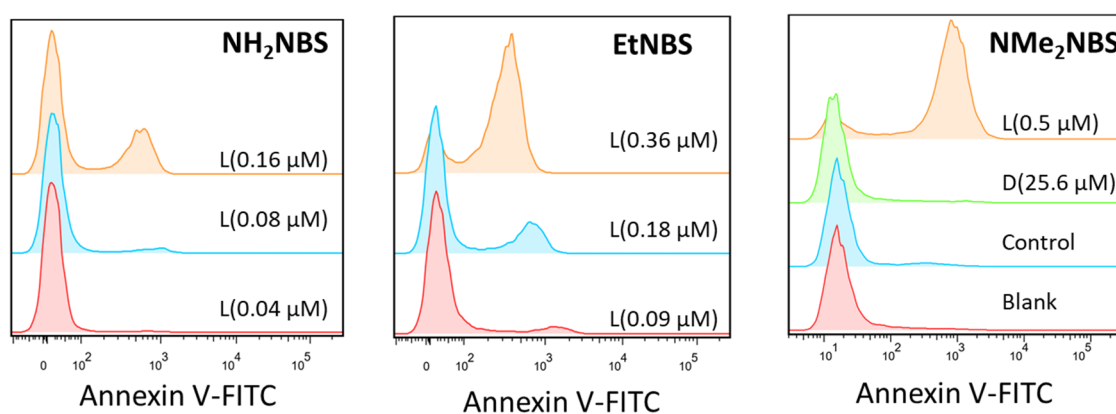

**Figure. S8.** Flow cytometric assay of photoirradiation-induced apoptosis for HepG2 cells incubated with different concentrations of  $\text{NH}_2\text{NBS}$ , EtNBS and  $\text{NMe}_2\text{NBS}$ . L: light, D: Dark.

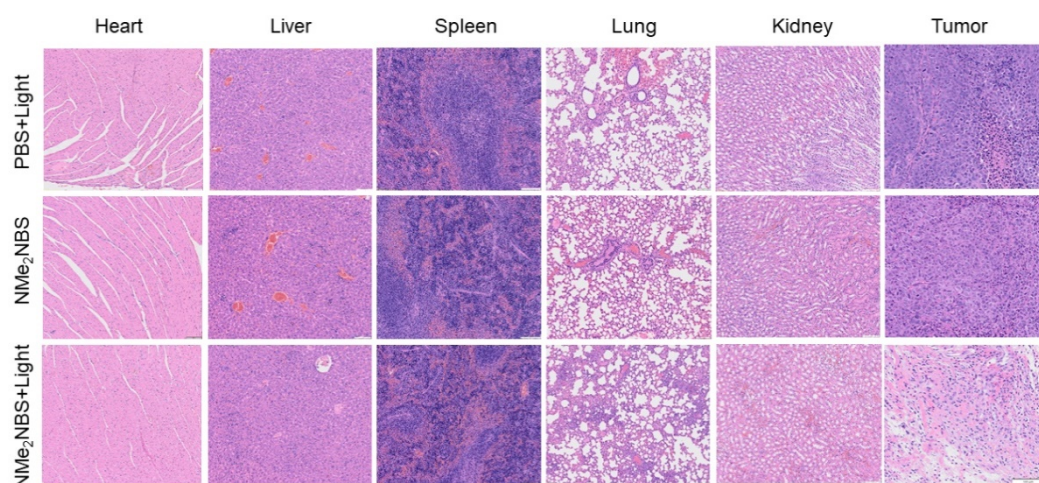

**Figure S9.** H&E staining of organ tissues and tumor tissue slices after four weeks treatment.

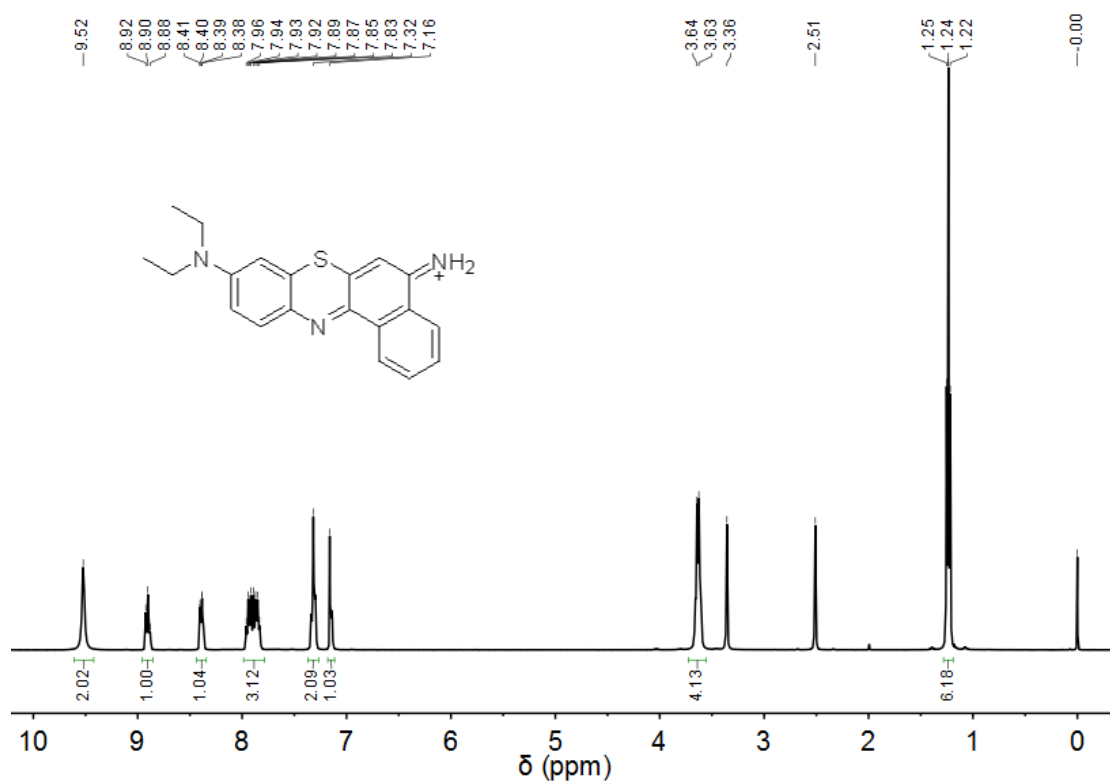

**Figure S10.**  $^1\text{H}$ NMR of  $\text{NH}_2\text{NBS}$  in  $\text{DMSO}-d_6$ .

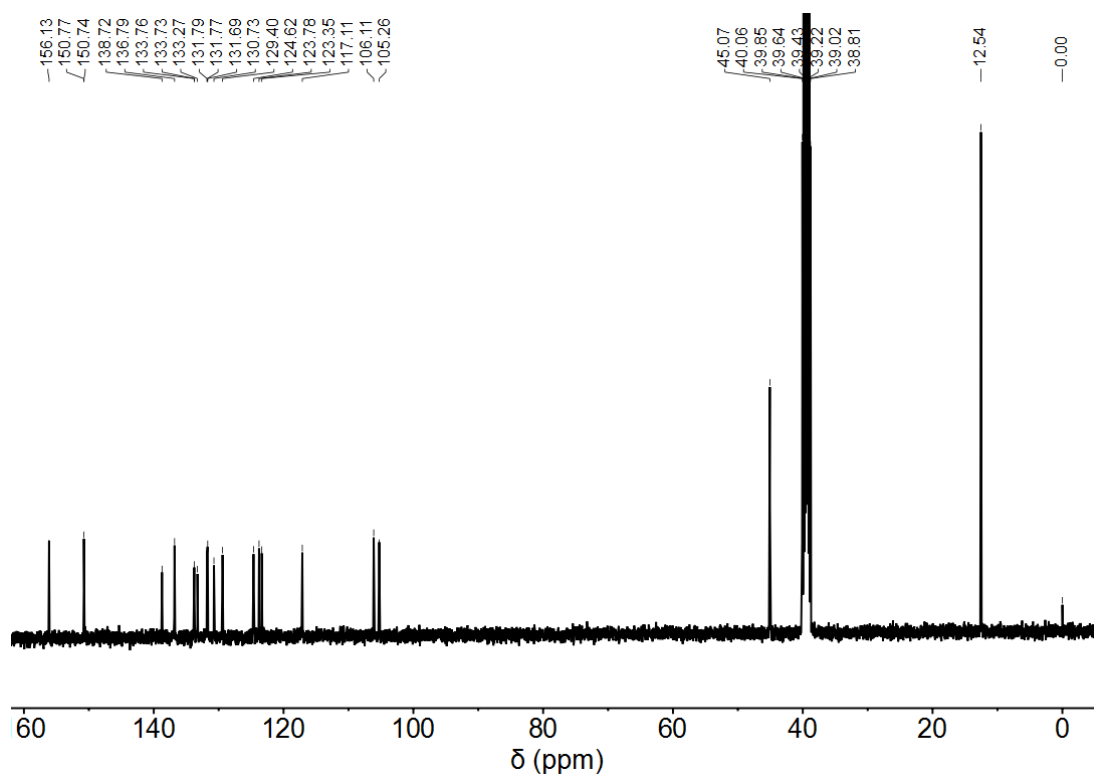

**Figure S11.**  $^{13}\text{C}$ NMR of  $\text{NH}_2\text{NBS}$  in  $\text{DMSO}-d_6$ .

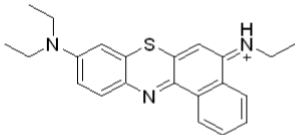

152.67  
150.73  
139.65  
136.73  
133.40  
133.05  
133.00  
131.99  
131.95  
131.22  
131.09  
129.40  
124.61  
123.96  
123.92  
122.99  
117.27  
105.25  
102.76  
45.03  
40.06  
39.85  
39.64  
39.53  
39.43  
39.22  
39.01  
38.93  
38.80  
13.87  
12.57  
-0.00

$\delta$  (ppm)

**Figure S13.**  $^{13}\text{C}$ NMR of EtNBS in DMSO- $d_6$ .

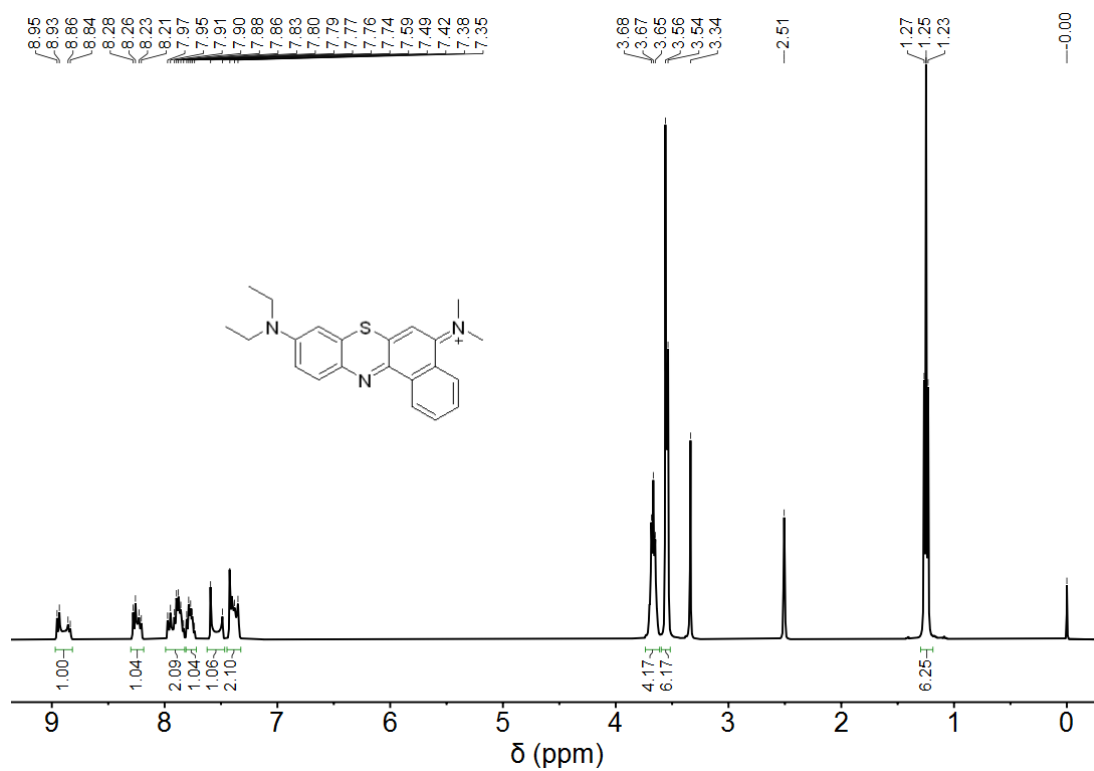

**Figure S14.** <sup>1</sup>H NMR of NMe<sub>2</sub>NBS in DMSO-*d*<sub>6</sub>.

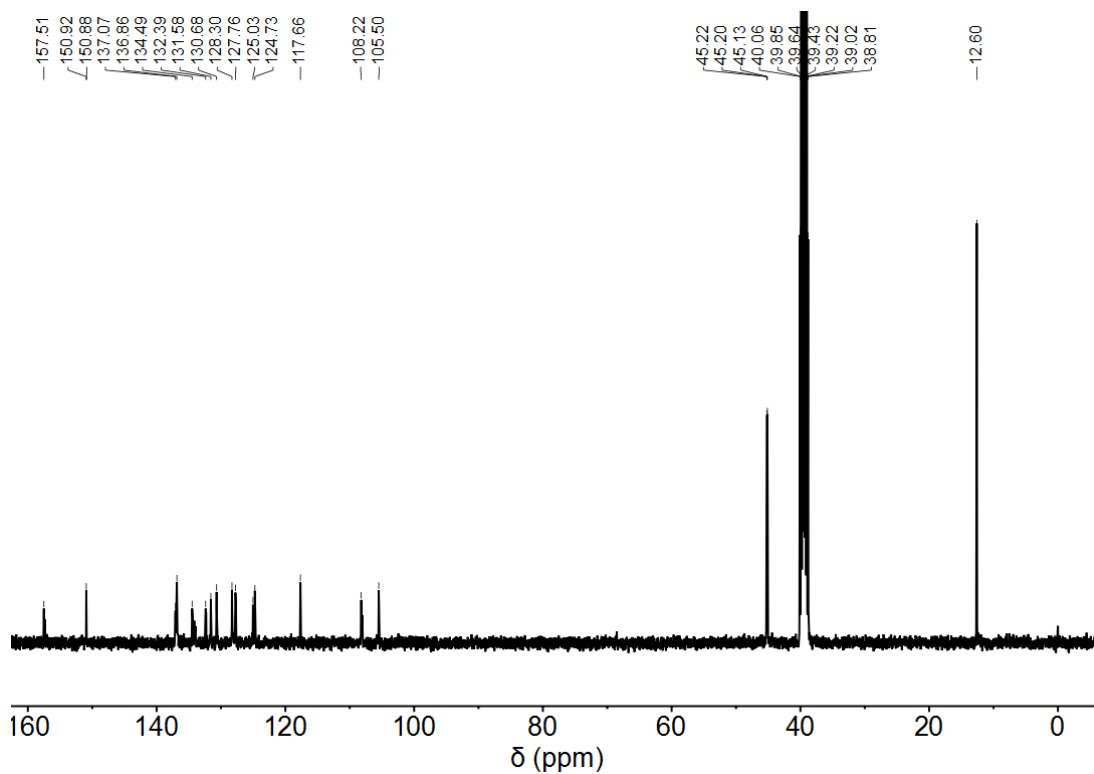

**Figure S15.** <sup>13</sup>C NMR of NMe<sub>2</sub>NBS in DMSO-*d*<sub>6</sub>.

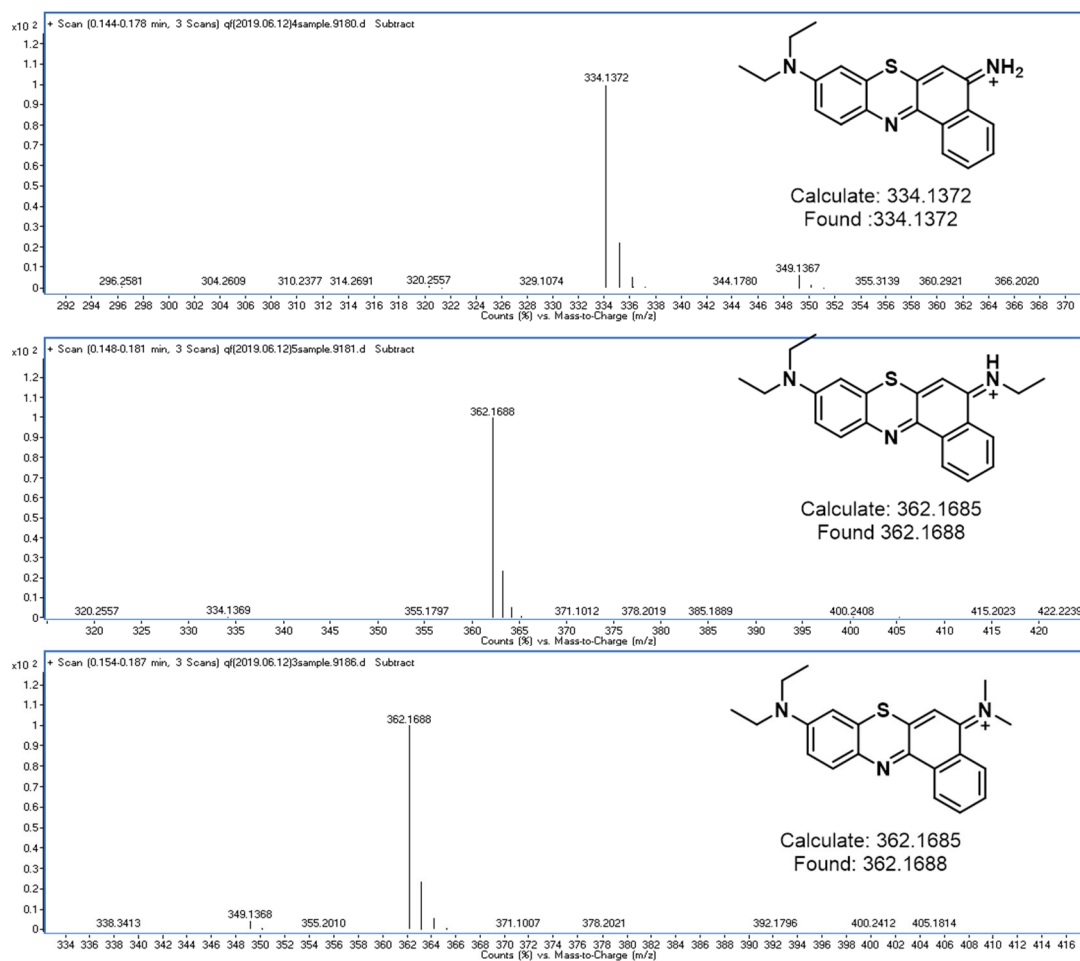

**Figure S16.** HRMS of NH<sub>2</sub>NBS, EtNBS and NMe<sub>2</sub>NBS.
